# Supplementary material
Source: Research Square preprint supplement (doi:10.21203/rs.3.rs-10016744/v1)
Supplement: Supplementary file 1 [file 8b0ef8fdabd6a68c63efddfb.docx]

| **Proteins** | **Host** | **Cat** | **Company** |
| --- | --- | --- | --- |
| SARS-CoV-2 spike protein D614G, His-Tag | HEK293 | SPN-C52H3 | ACROBiosystems |
| SARS-CoV-2 spike protein BA.1.1, His-Tag | HEK293 | SPN-C5224 | ACROBiosystems |
| SARS-CoV-2 spike protein BA.2, His-Tag | HEK293 | SPN-C5223 | ACROBiosystems |
| SARS-CoV-2 spike protein BA.4, His-Tag | HEK293 | SPN-C5229 | ACROBiosystems |
| SARS-CoV-2 spike protein XBB.1, His-Tag | HEK293 | SPN-C522t | ACROBiosystems |
| SARS-CoV-2 spike protein XBB.1.5, His-Tag | HEK293 | SPN-C524i | ACROBiosystems |
| SARS-CoV-2 spike protein XBB+K356T, His-Tag | HEK293 | SPNC522w | ACROBiosystems |
| SARS-CoV-2 spike protein EG.5.1/Omicron, His-Tag | HEK293 | SPNC524v | ACROBiosystems |
| SARS-CoV-2 spike protein BA.2.86/Omicron, His-Tag | HEK293 | SPNC524z | ACROBiosystems |
| SARS-CoV-2 spike protein, His Tag | EXPI293F | In house | 51 |
| SARS-CoV-2 spike protein BA.1, His Tag | EXPI293F | In house | 51 |
| SARS-CoV-2 spike protein BA.5, His Tag | EXPI293F | In house | 51 |
| Biotinylated SARS-CoV-2 spike protein D614G, His,Avitag | HEK293 | SPN-C82E3 | ACROBiosystems |
| Biotinylated SARS-CoV-2 spike protein BA.1, His,Avitag | HEK293 | SPNC82Ee | ACROBiosystems |
| Biotinylated SARS-CoV-2 spike protein BA.2, His,Avitag | HEK293 | SPN-C82Er | ACROBiosystems |
| Biotinylated SARS-CoV-2 spike protein BA.5, His,Avitag | HEK293 | SPN-C82Eu | ACROBiosystems |

**Supplementary Table 1**. Recombinant SARS-CoV-2 spike proteins used in this study
